# Supplementary material for: UBR5 targets tumor suppressor CDC73 proteolytically to promote aggressive breast cancer
Source: PubMed Central journal article supplement (PMC9098409; doi:10.1038/s41419-022-04914-6), 2022-05-12

Original Data for

## **UBR5 targets tumor suppressor CDC73 proteolytically to promote aggressive triple-negative breast cancer**

Gang Xiang, Shuxuan Wang, Ling Chen, Mei Song, Xiaoxu Song, Huan Wang, Pengbo Zhou, Xiaojing Ma, Jing Yu

This file contains the following contents:

Original WB images

Original immunofluorescence images

Original cell/tissue morphology, tumor and lung tissue images

Original WB images

Figure 2A

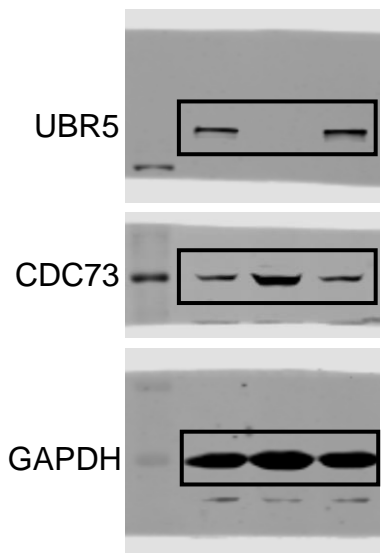

Figure 2B

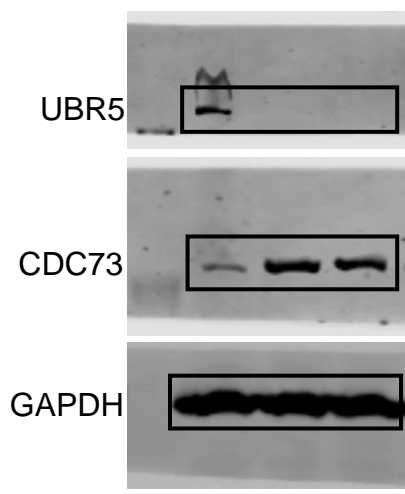

Figure 2C

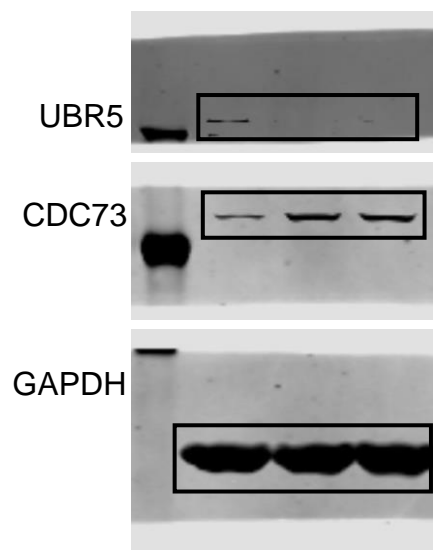

Figure 2D

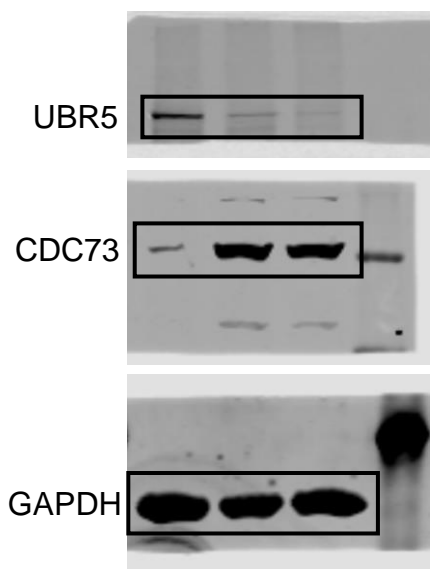

Figure 4B

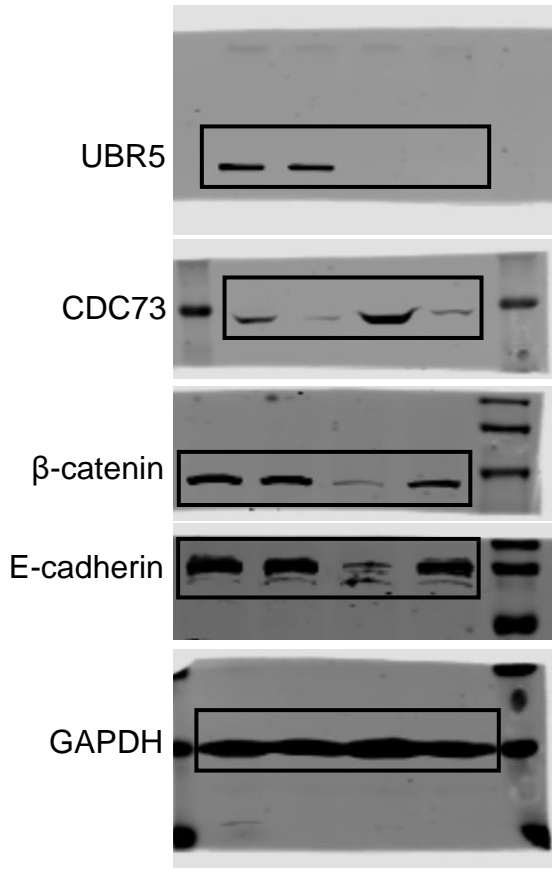

Figure 5A

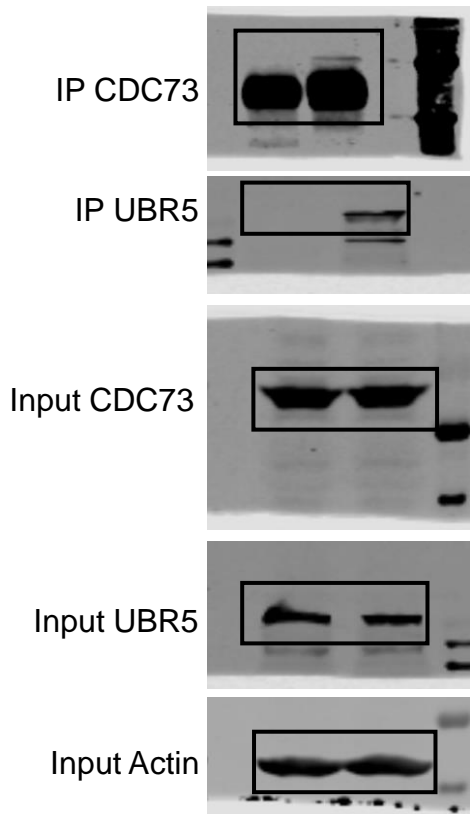

Figure 5D

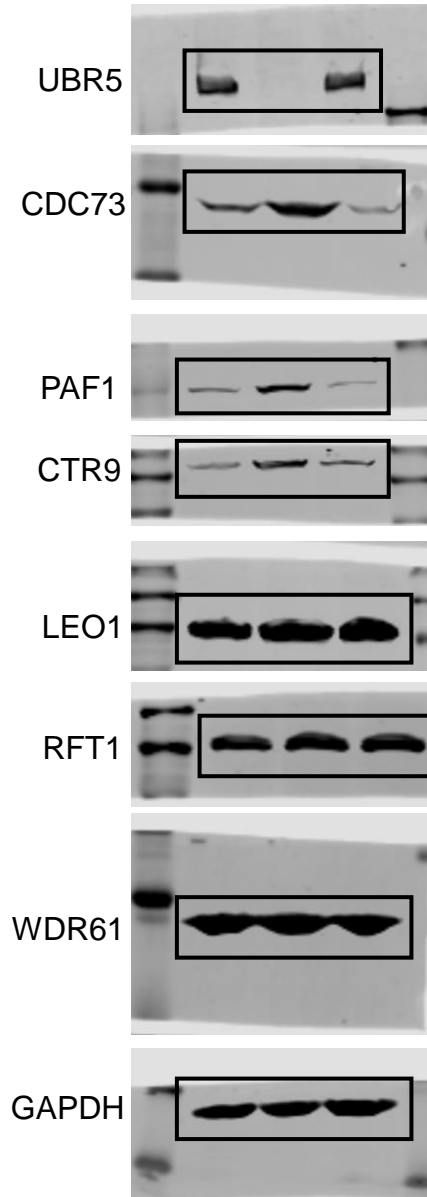

Figure 5E

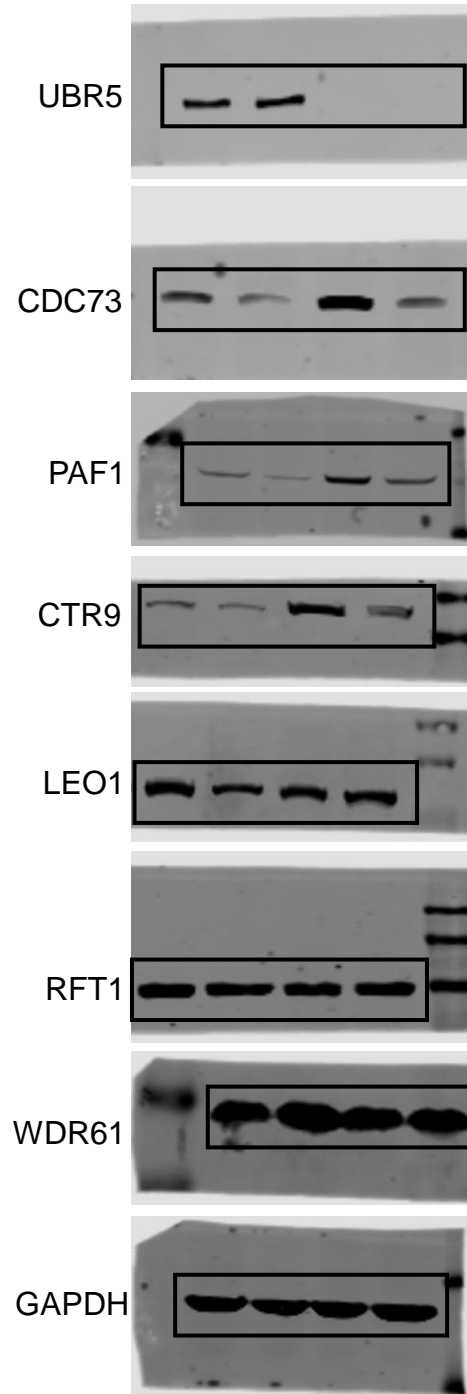

Figure 5B

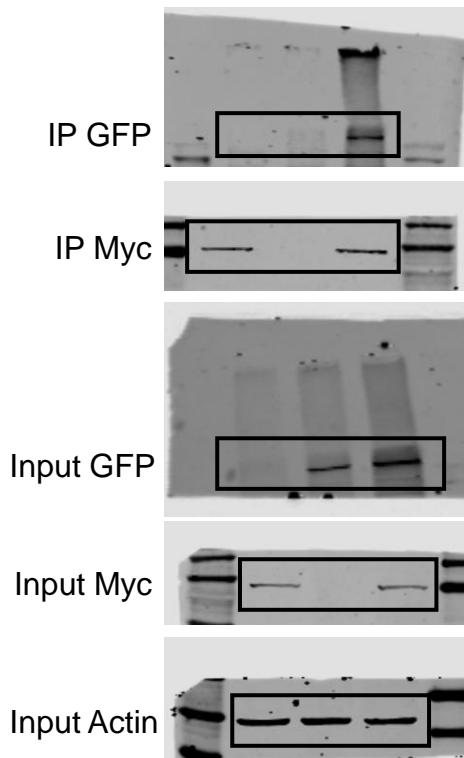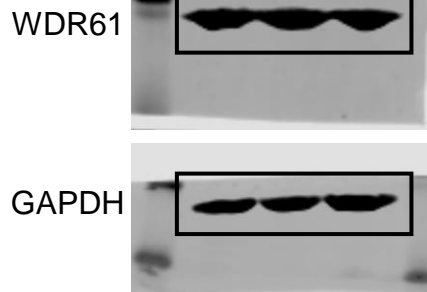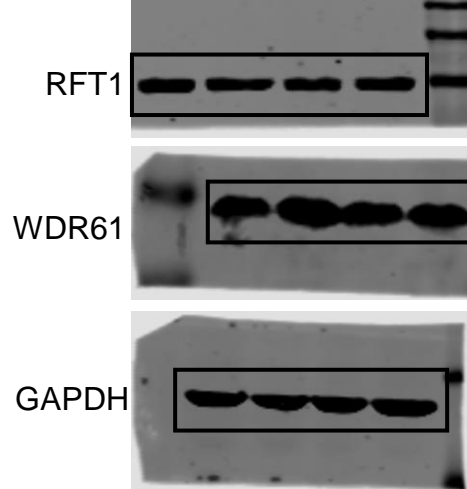

Figure 5F

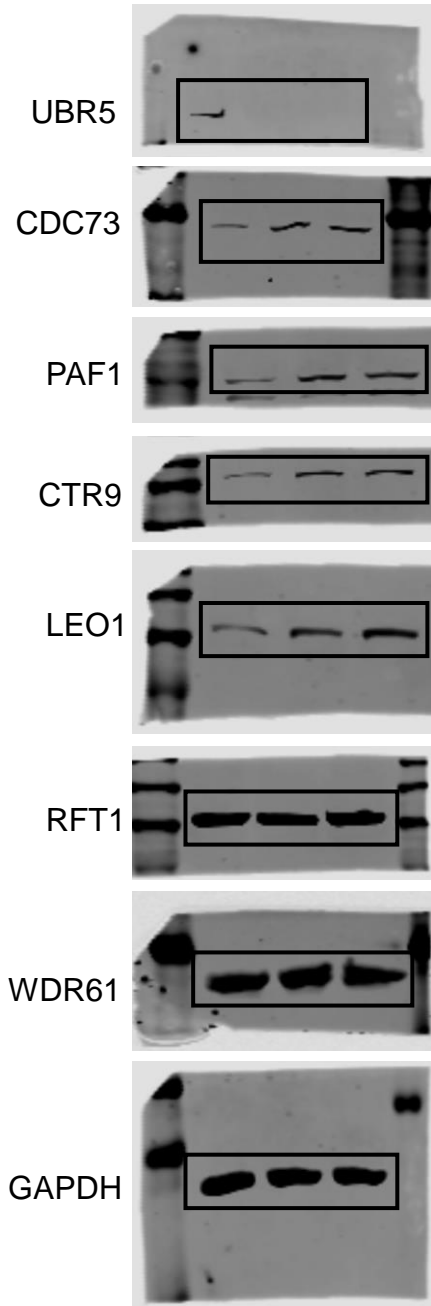

Figure 5G

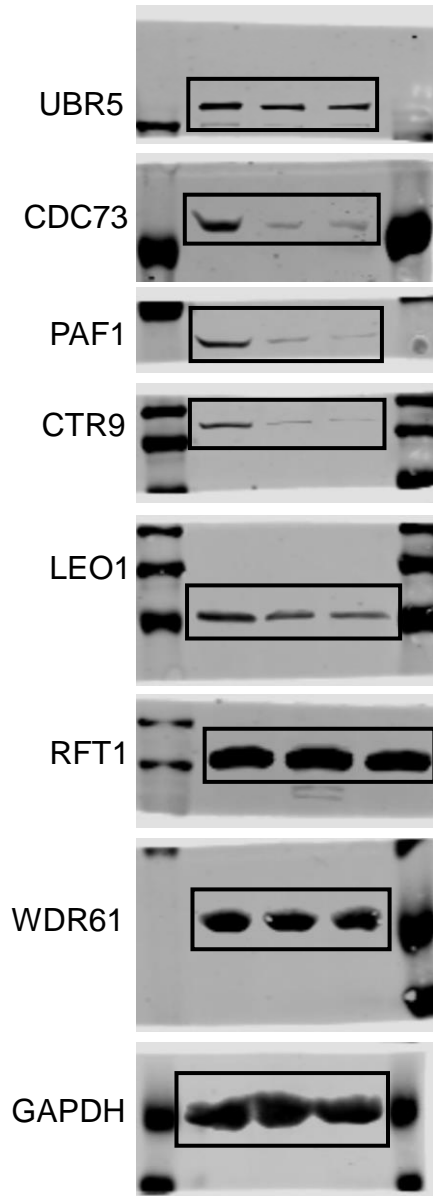

Figure 6A

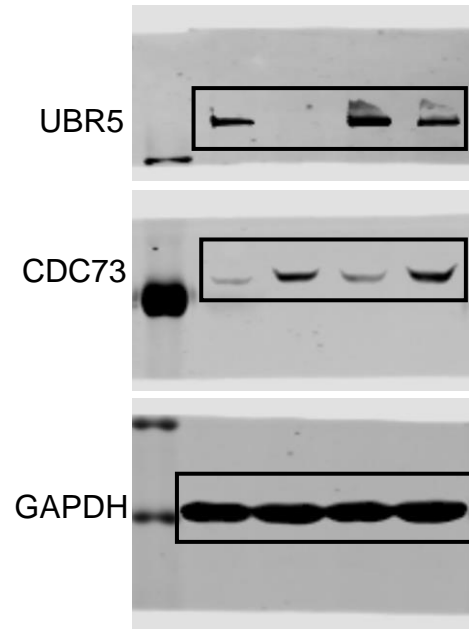

Figure 6B

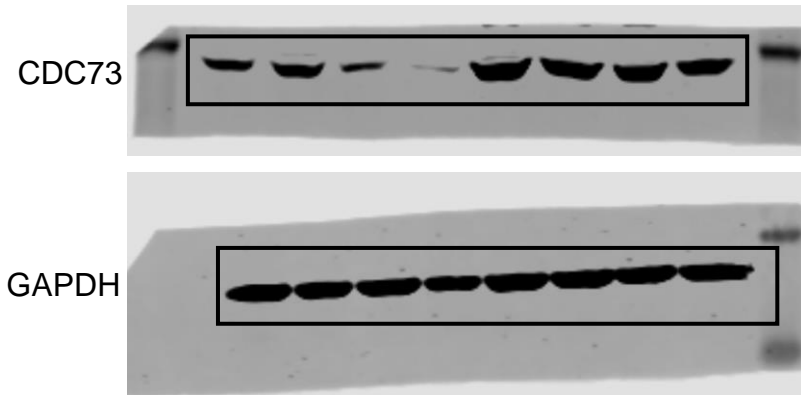

Figure 6D

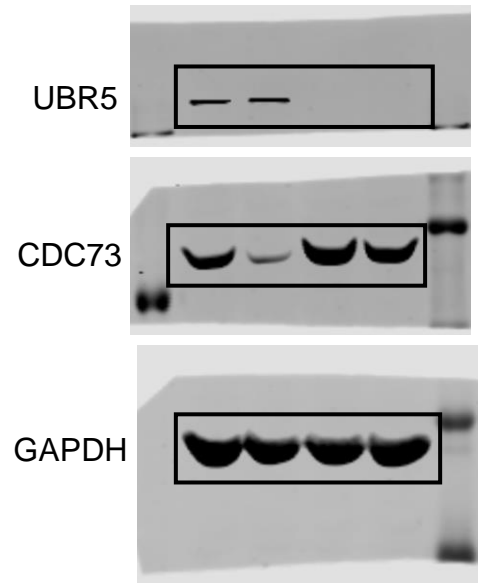

Figure 6C

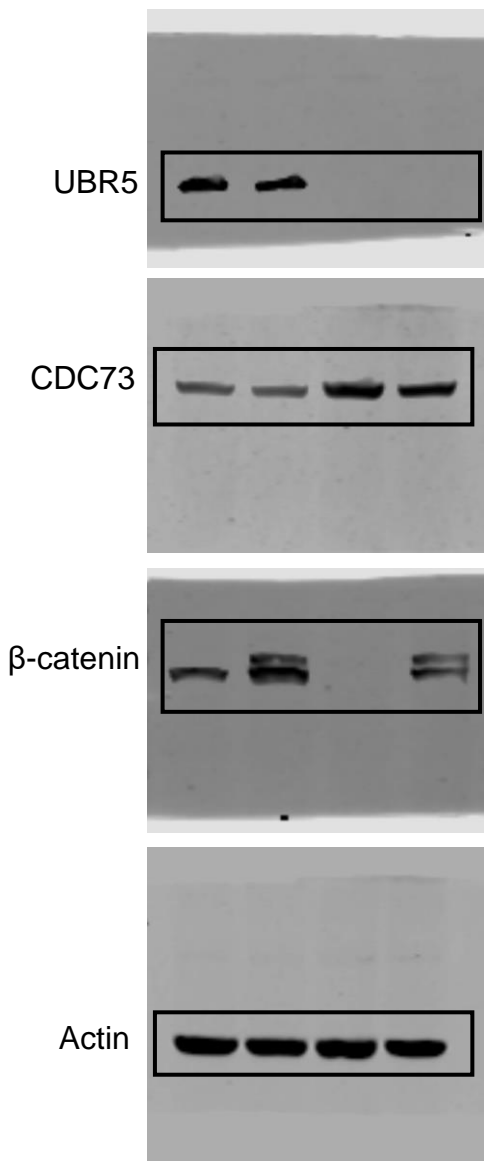

Figure 6E

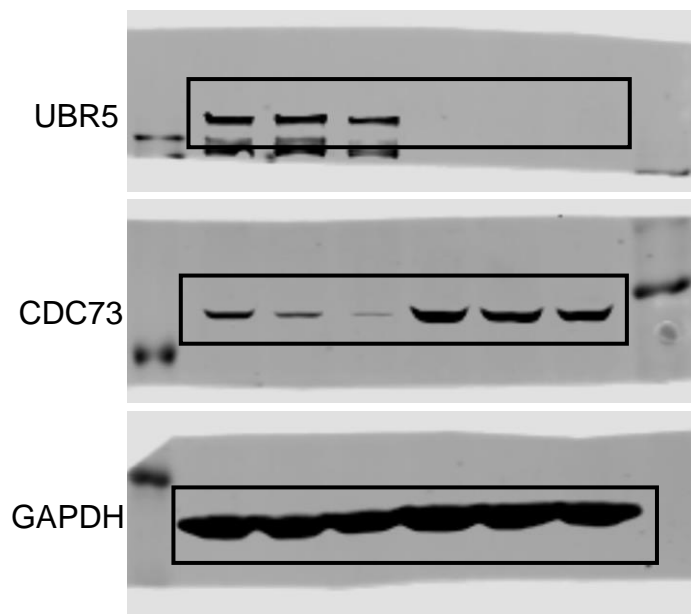

Figure 6F

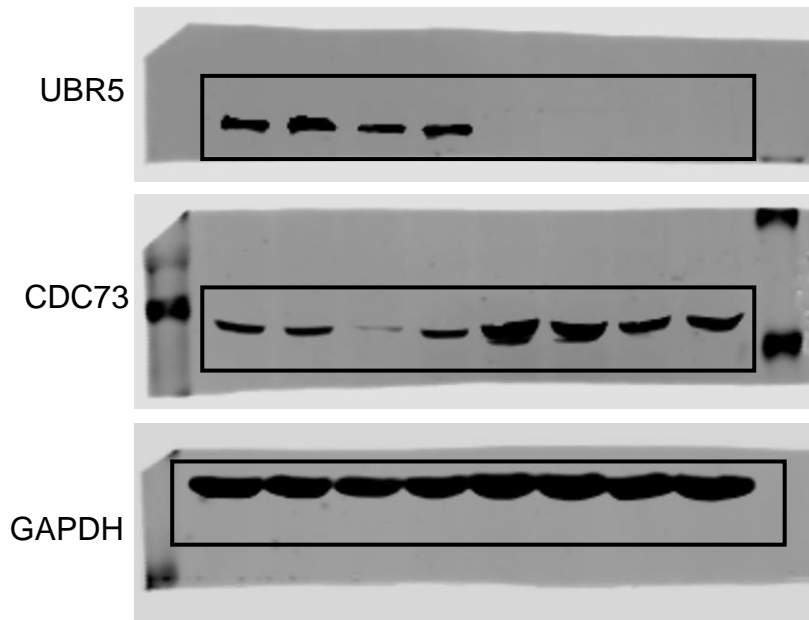

Figure 6H

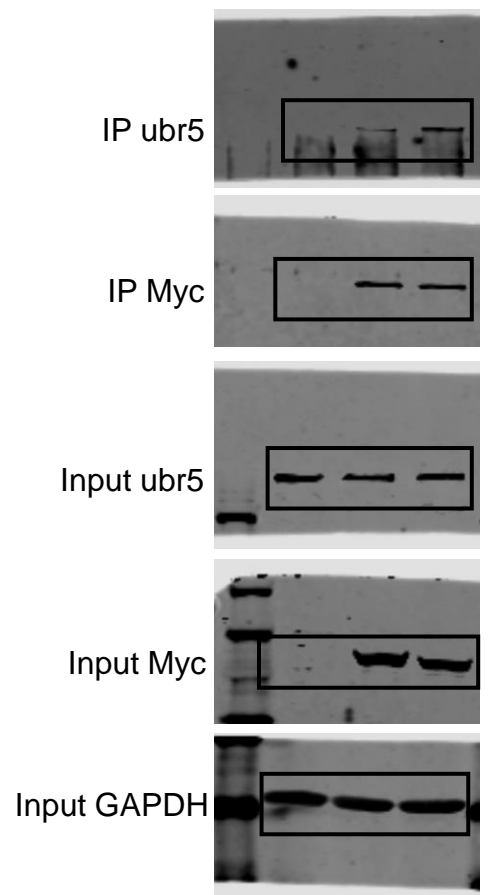

Figure 6G

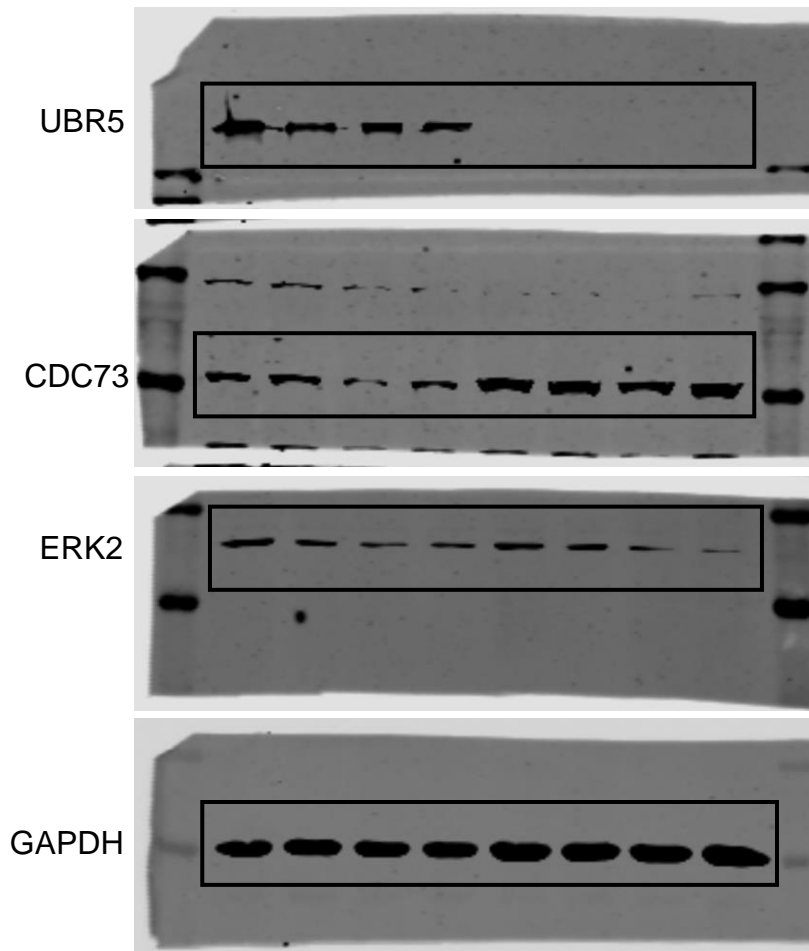

Figure 6I

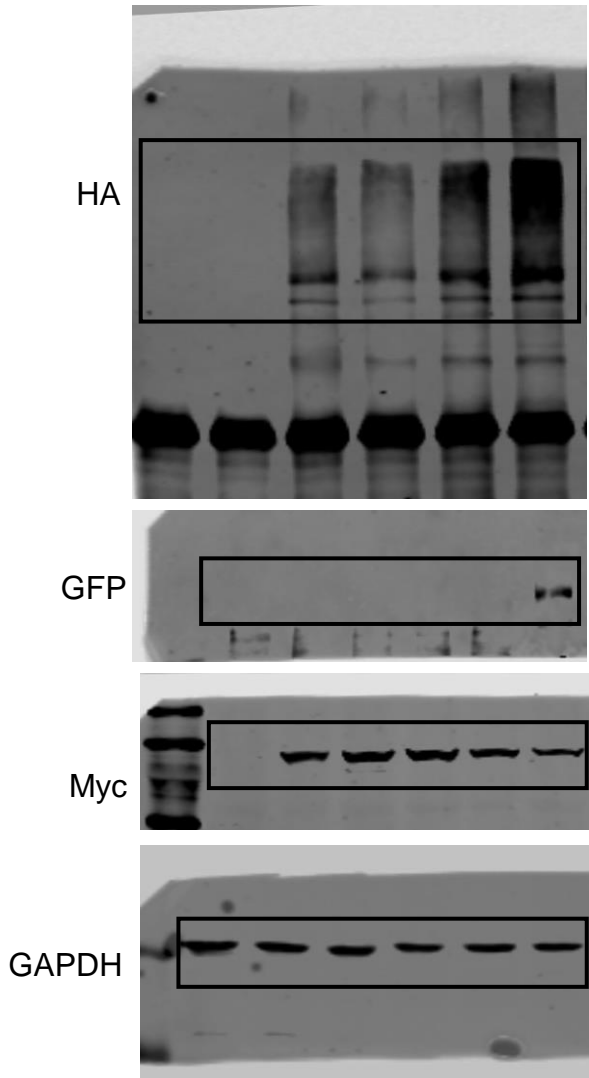

Figure 6J

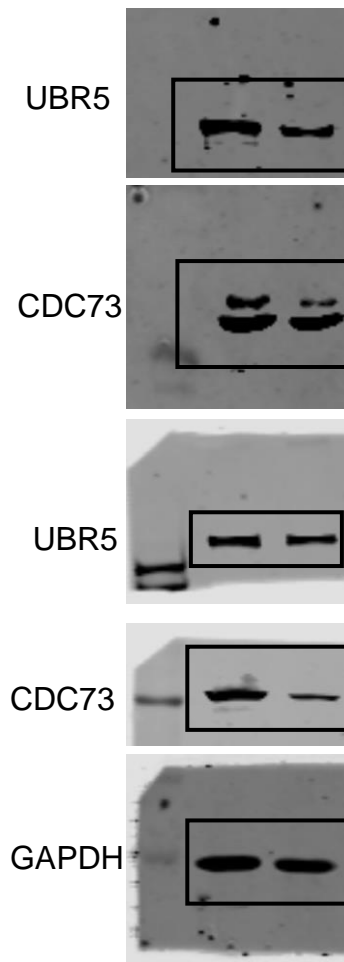

Figure 6K

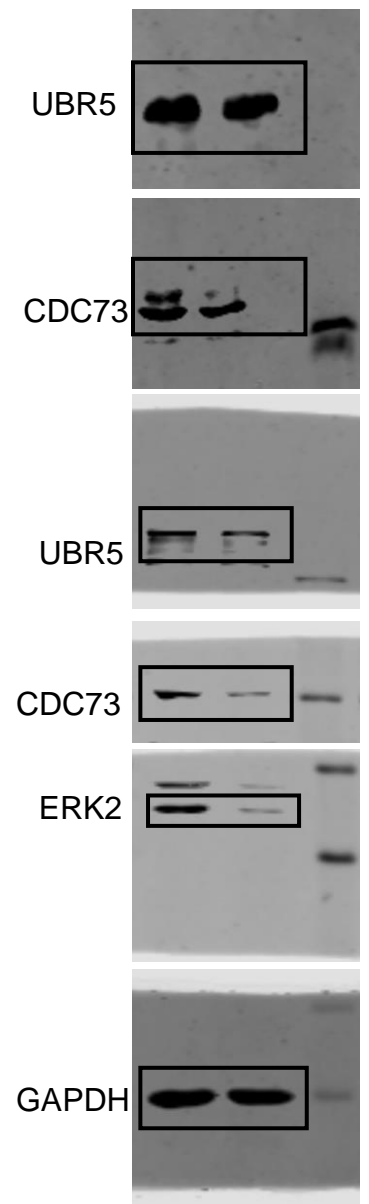

Figure 6L

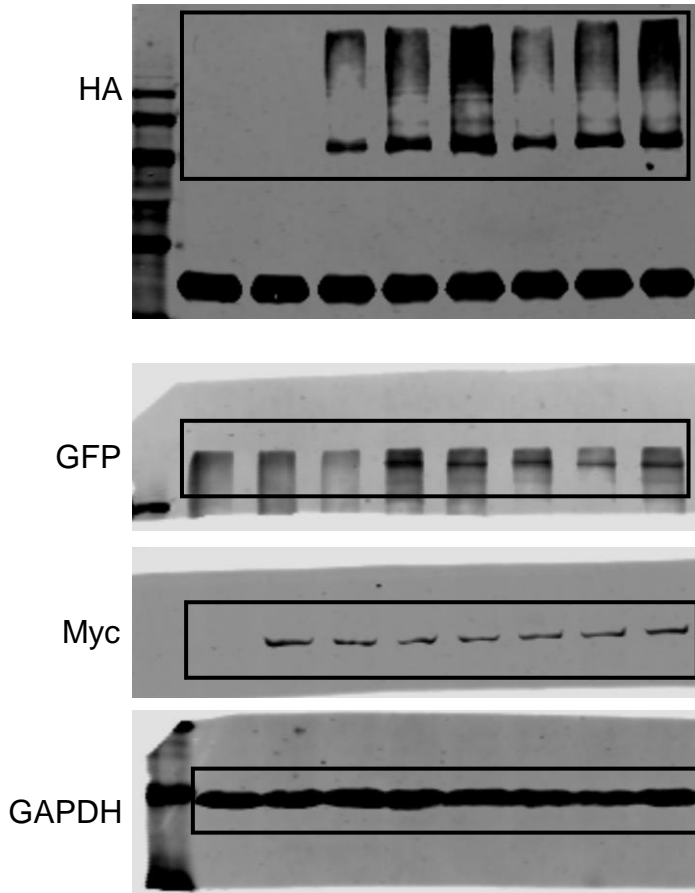

Figure 6M

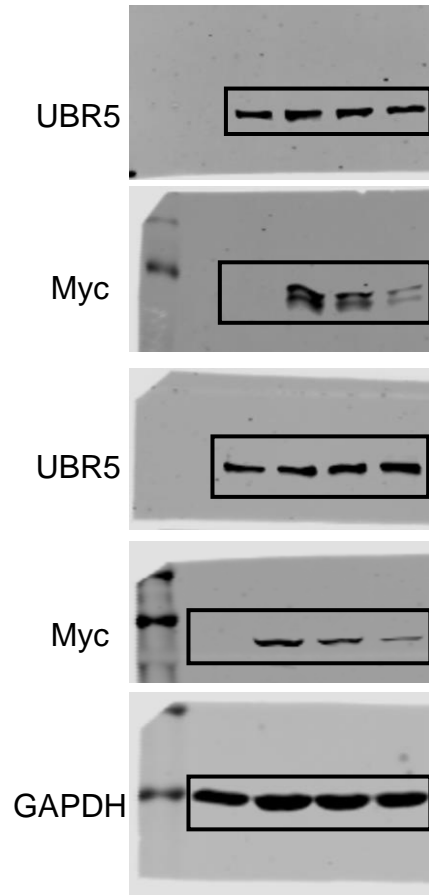

Figure 6N

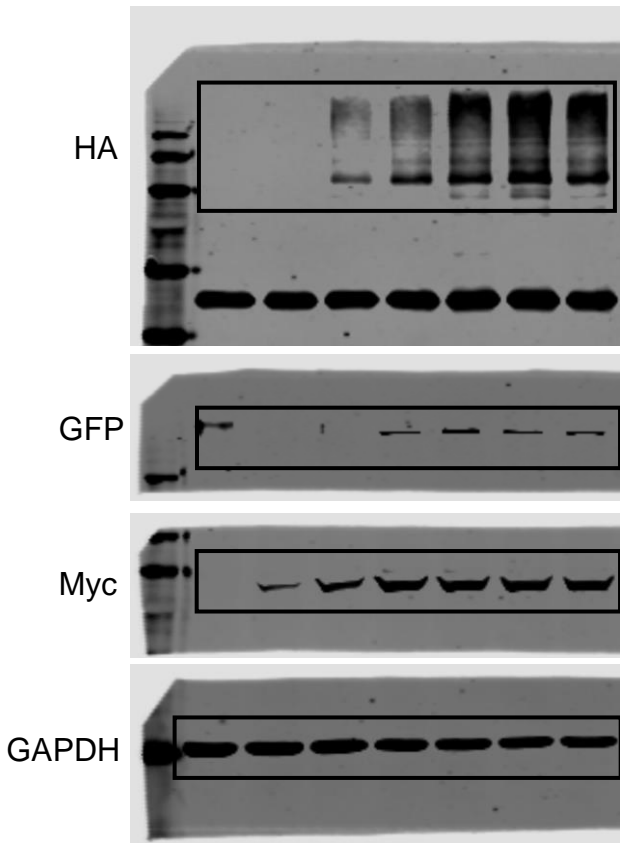

Figure 6O

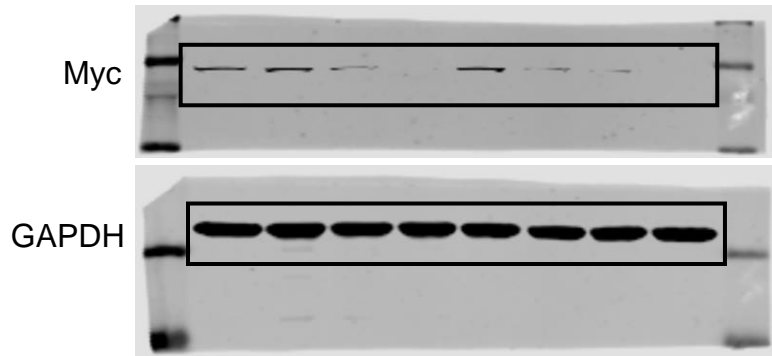



Figure 7B

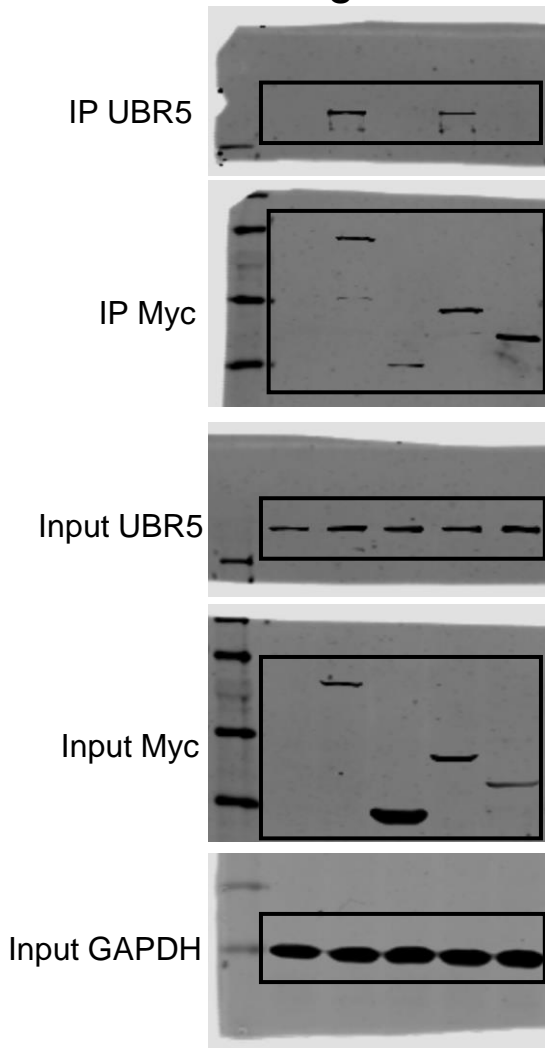

Figure 7C

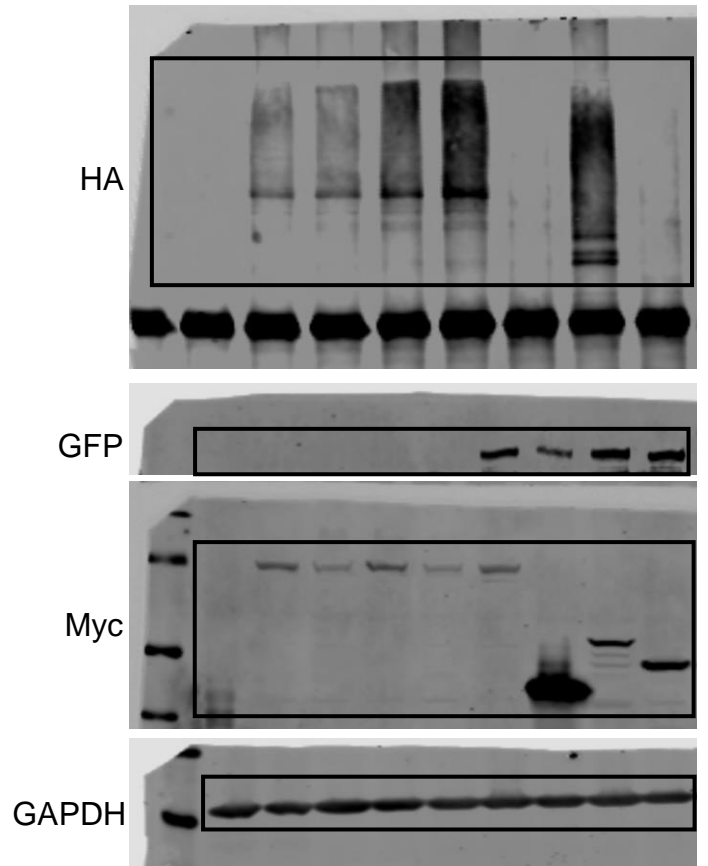

Figure 7D

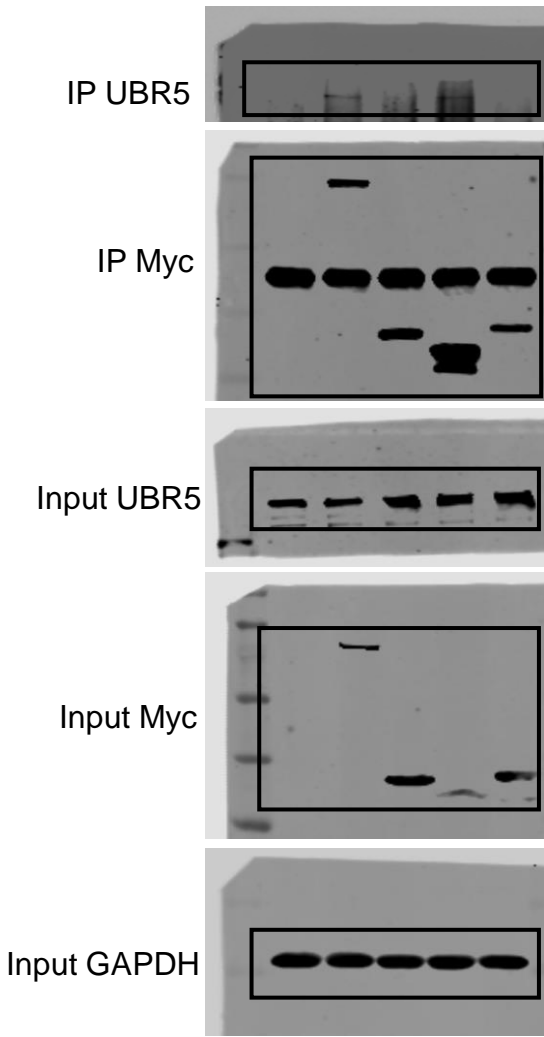

Figure 7E

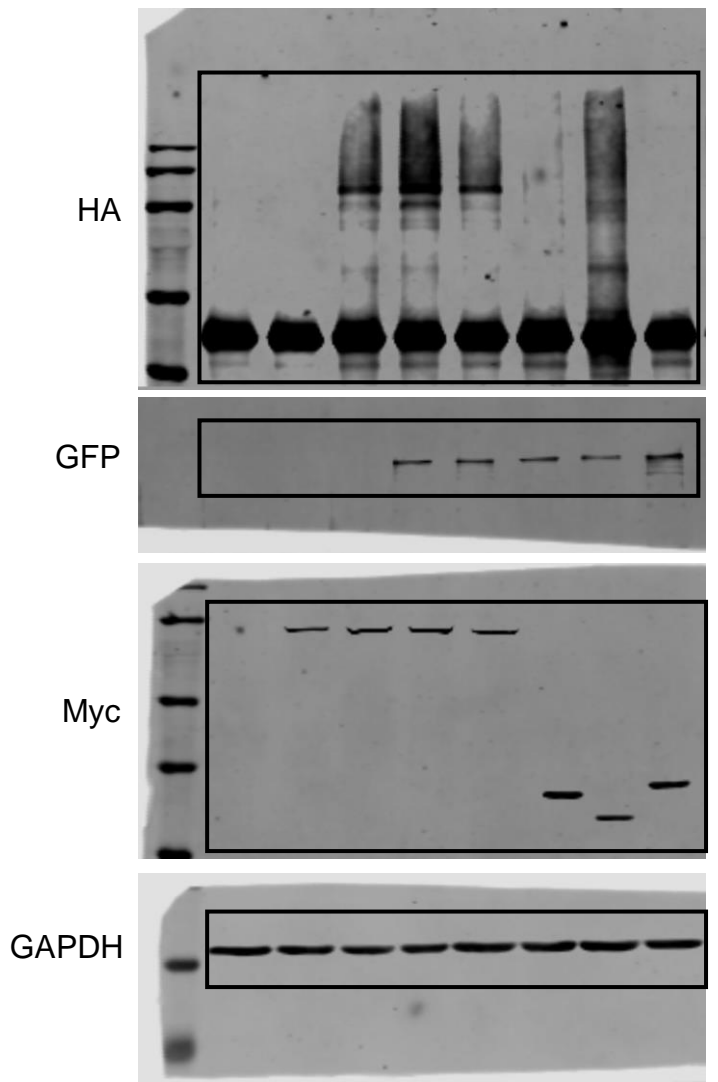

Figure 7F

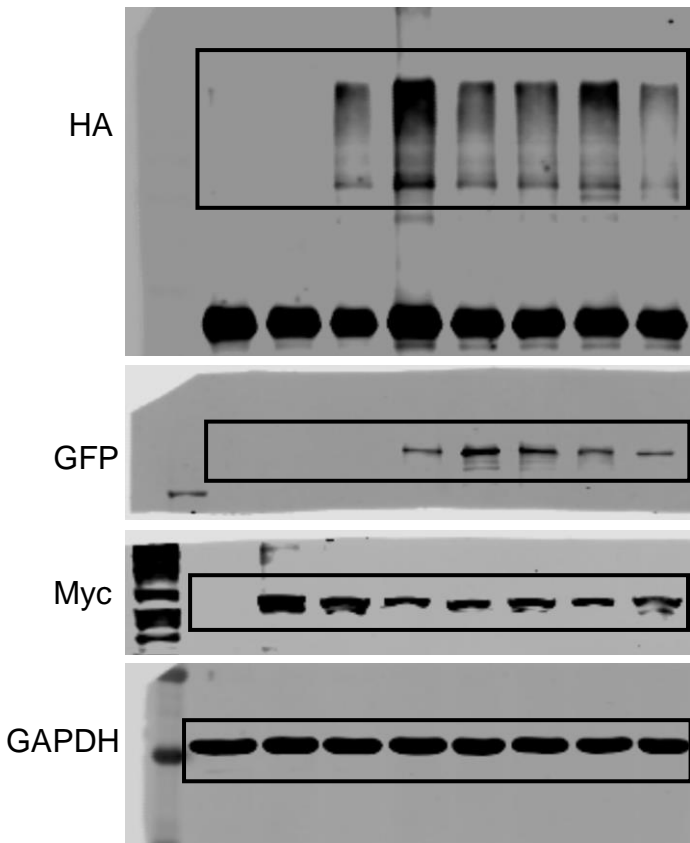

Figure S1A

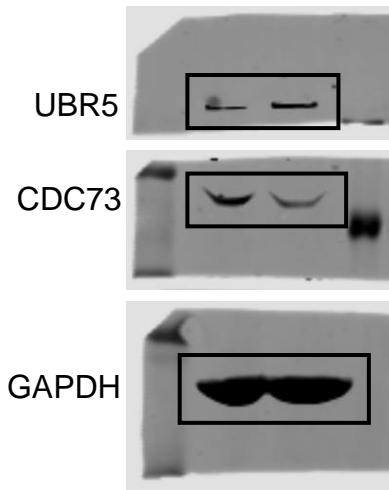

Figure S2B

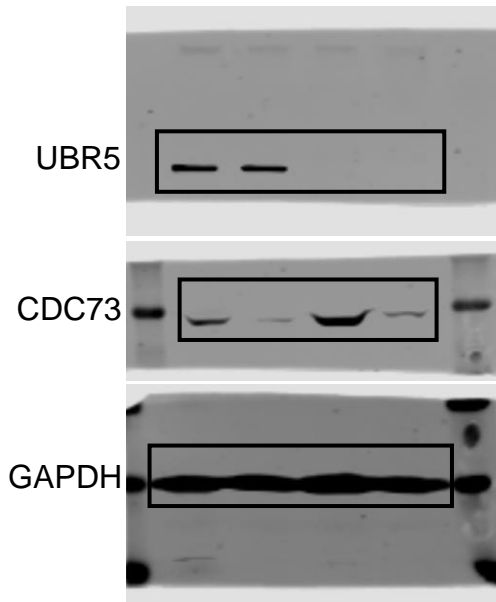

Figure S2D

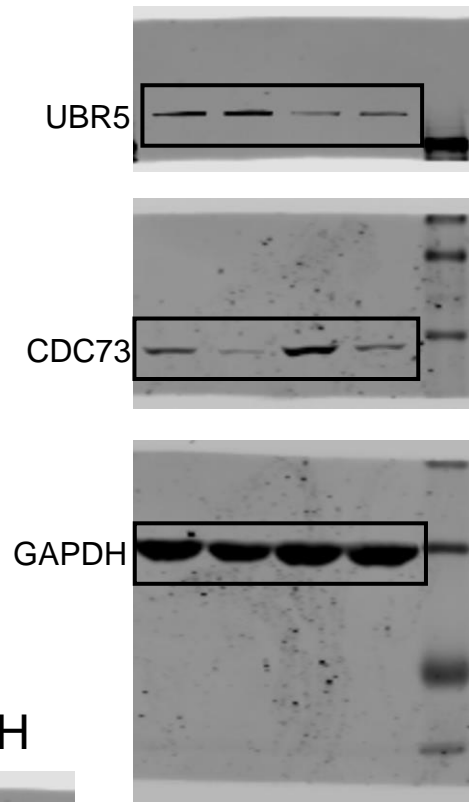

Figure S2F

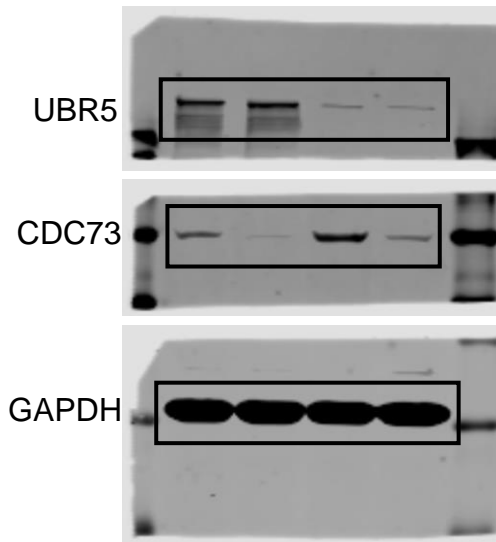

Figure S2H

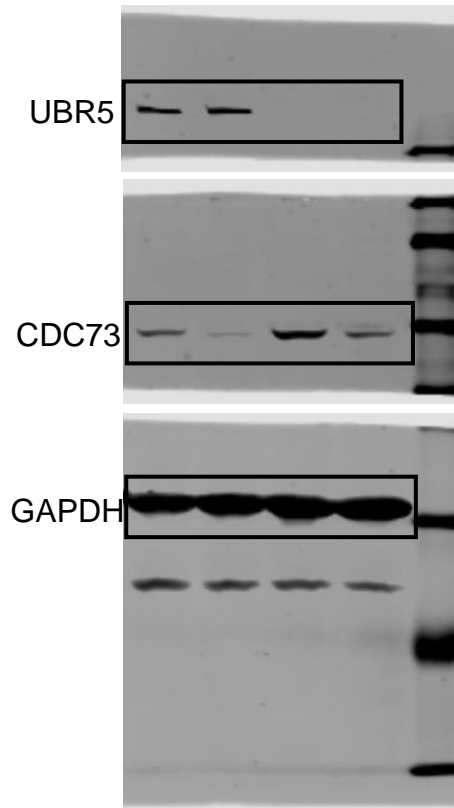

Figure S7A

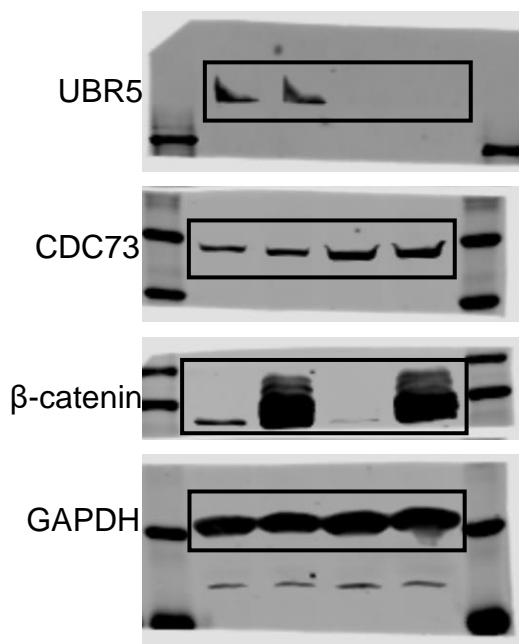

Figure S7B

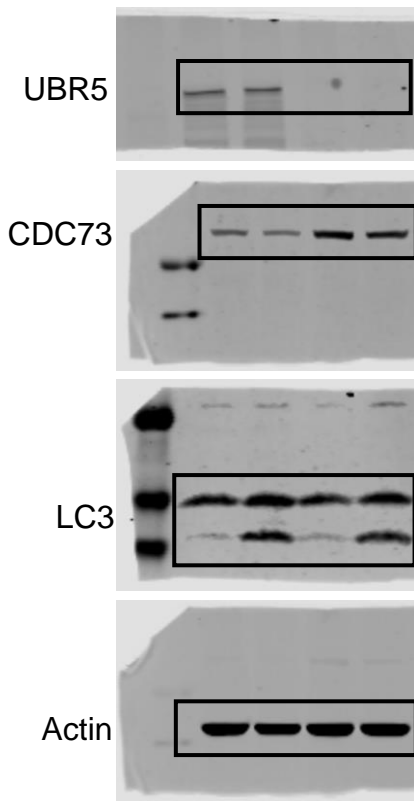

Figure S7C

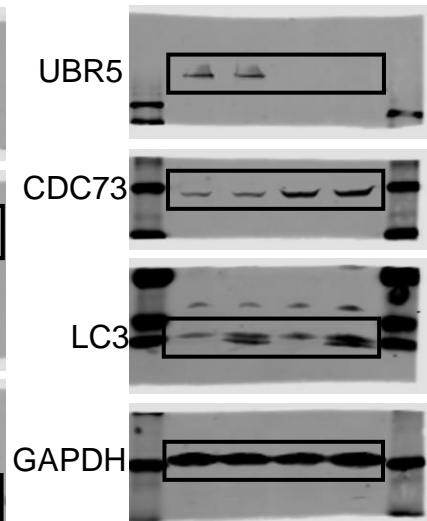

Original immunofluorescence images

Figure 5C

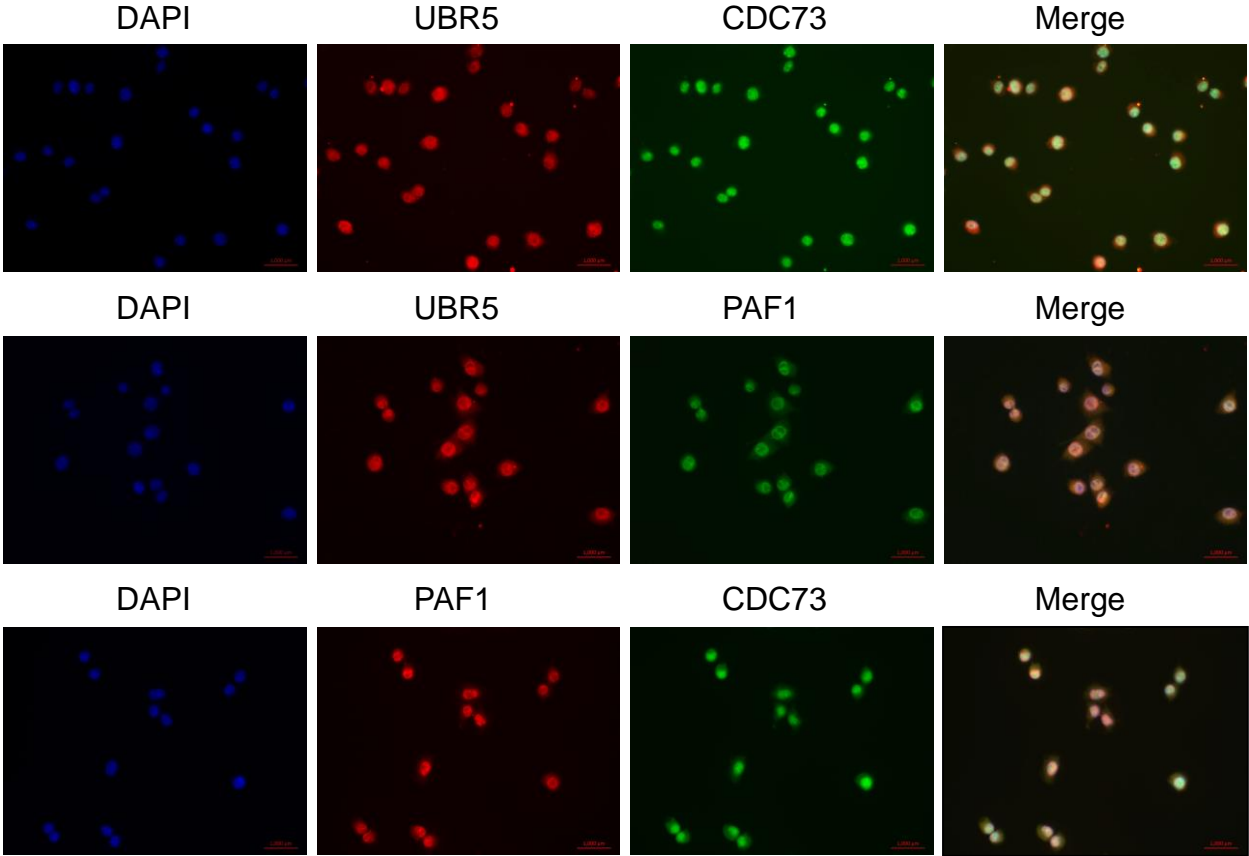

Figure 3B

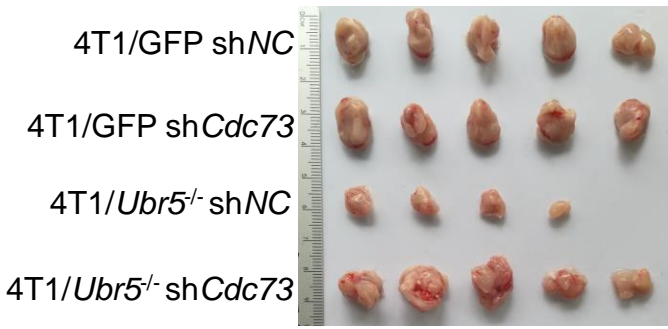

Figure 4D

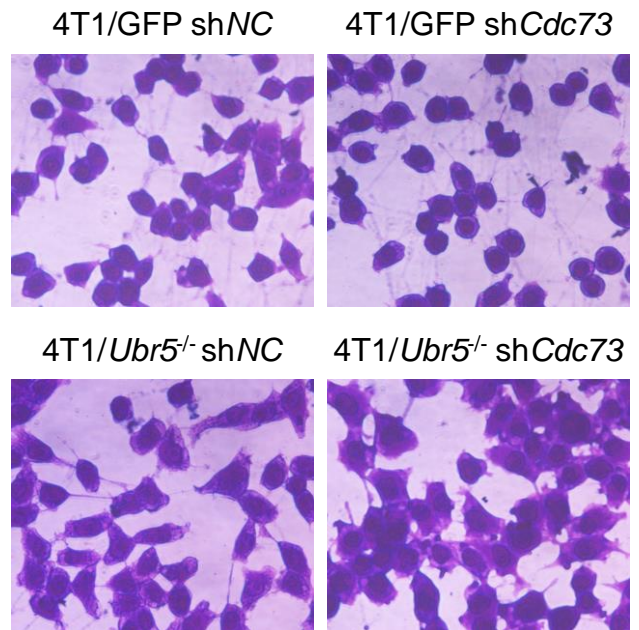

Figure 3H

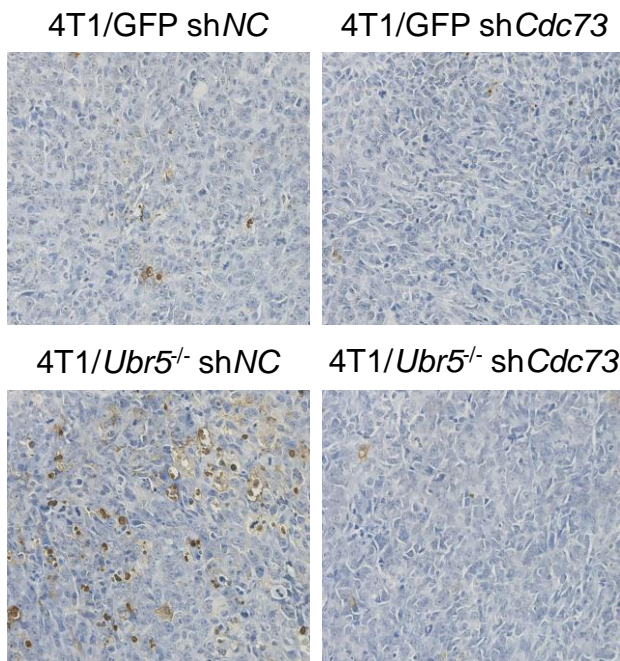

Figure 4H

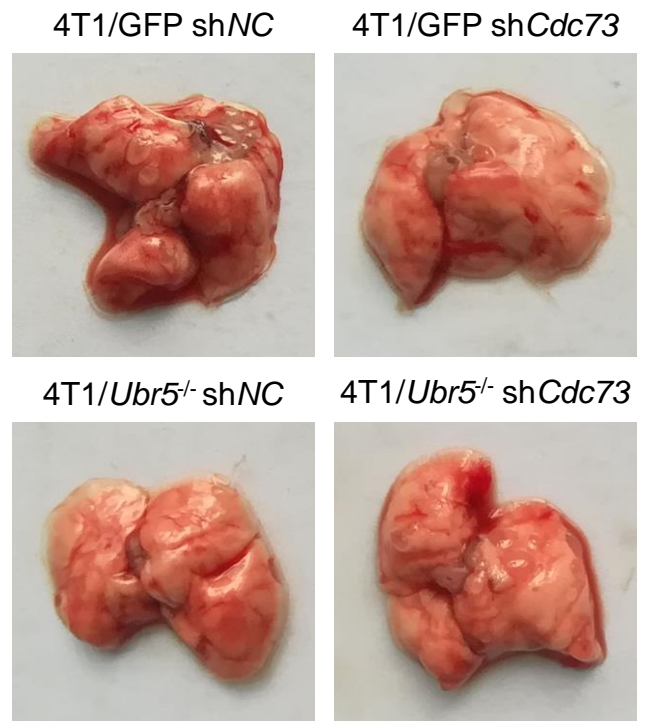

Figure 4J

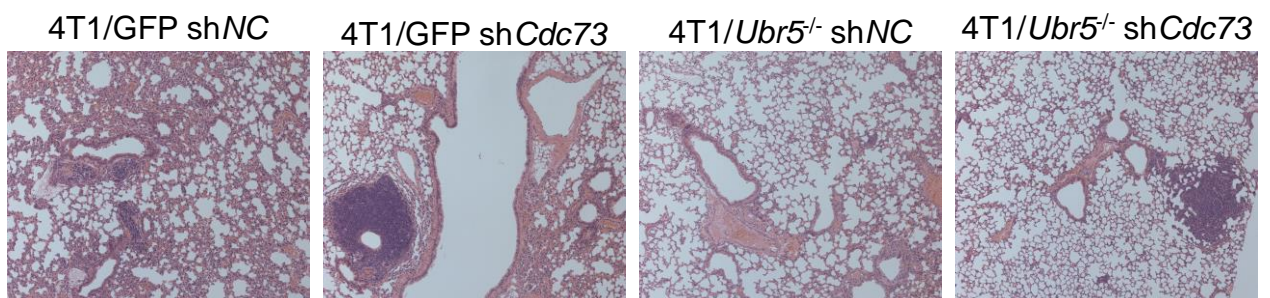



Figure S5B

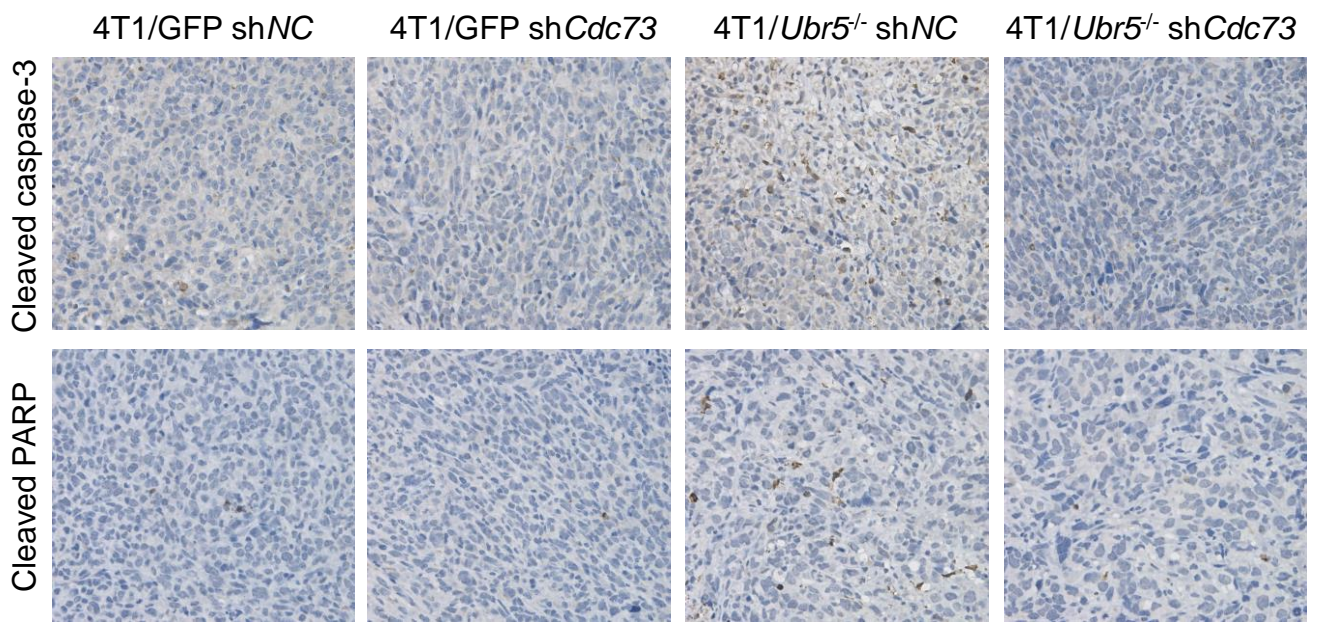

Supplement: 41419_2022_4914_MOESM2_ESM.pdf [file 41419_2022_4914_MOESM2_ESM.pdf]
